# Supplementary material for: Bifunctional 3-Hydroxy-4-Pyridinones as Potential Selective Iron(III) Chelators: Solution Studies and Comparison with Other Metals of Biological and Environmental Relevance
Source: MDPI journal article supplement (doi:10.3390/molecules26237280), 2021-11-30
Supplement: s1 [file s1]

## SUPPLEMENTARY MATERIALS

### **Bifunctional 3-hydroxy-4-pyridinones as potential selective iron(III) chelators: solution studies and comparison with other metals of biological and environmental relevance**

Anna Irto,<sup>\*1</sup> Paola Cardiano,<sup>1</sup> Karam Chand,<sup>2</sup> Rosalia Maria Cigala,<sup>1</sup>

Francesco Crea,<sup>1</sup> Concetta De Stefano<sup>1</sup> and Maria Amélia Santos<sup>\*2</sup>

<sup>1</sup> *Dipartimento di Scienze Chimiche, Biologiche, Farmaceutiche e Ambientali, Università di Messina, Viale F. Stagno d'Alcontres, 31 – 98166 Messina, Italy*

<sup>2</sup> *Centro de Química Estrutural, Instituto Superior Técnico, Universidade de Lisboa, Av. Rovisco Pais 1, 1049-001 Lisboa, Portugal*

---

<sup>\*</sup>Corresponding authors: Anna Irto, email: [airto@unime.it](mailto:airto@unime.it); Maria Amélia Santos, email: [masantos@tecnico.ulisboa.pt](mailto:masantos@tecnico.ulisboa.pt)

## Tables

**Table S1.** Overall and stepwise protonation constants<sup>1</sup> of the 3-hydroxy-4-pyridinones under study reported in the literature at  $I = 0.15 \text{ mol L}^{-1}$  in  $\text{NaCl}_{(\text{aq})}$  and different temperatures [13].

| Ligand                  | $I/\text{mol L}^{-1}$ | $T/\text{K}$ | $\log K_1^{\text{H}}$ | $\log \beta_2^{\text{H}} (\log K_2^{\text{H}})$ | $\log \beta_3^{\text{H}} (\log K_3^{\text{H}})$ | $\log \beta_4^{\text{H}} (\log K_4^{\text{H}})$ |
|-------------------------|-----------------------|--------------|-----------------------|-------------------------------------------------|-------------------------------------------------|-------------------------------------------------|
| $\text{H}_2(\text{L1})$ | 0.15                  | 298.15       | 9.947                 | 14.36 (4.41)                                    | 17.74 (3.38)                                    | -                                               |
| $\text{H}_2(\text{L2})$ | 0.15                  | 298.15       | 10.73                 | 19.52 (8.79)                                    | 24.17 (4.65)                                    | 27.43 (3.26)                                    |
|                         | 0.15                  | 310.15       | 10.99                 | 17.05 (6.06)                                    | 21.02 (3.97)                                    | 24.08 (3.06)                                    |
| $\text{H}_2(\text{L3})$ | 0.15                  | 298.15       | 10.93                 | 20.70 (9.77)                                    | 25.60 (4.90)                                    | 29.02 (3.42)                                    |
| $\text{H}_2(\text{L4})$ | 0.15                  | 298.15       | 11.10                 | 20.44 (9.34)                                    | 24.60 (4.16)                                    | 27.87 (3.27)                                    |
| $\text{H}(\text{L5})$   | 0.15                  | 298.15       | 11.08                 | 20.468(9.388)                                   | 23.68 (3.21)                                    | -                                               |
|                         | 0.15                  | 310.15       | 10.57                 | 16.53 (5.96)                                    | 19.53 (3.00)                                    | -                                               |

<sup>1</sup>  $\log \beta_r^{\text{H}}$  and  $\log K_r^{\text{H}}$  refer to the equilibria:  $r\text{H}^+ + \text{L}^{z-} = \text{H}_r\text{L}^{-(z-r)}$  and  $\text{H}^+ + \text{H}_{(r-1)}\text{L}^{-(z-(r-1))} = \text{H}_r\text{L}^{-(z-r)}$ , respectively.

**Table S2.** Literature stability constants of Cu<sup>2+</sup> and Fe<sup>3+</sup>/ligands species reported at different temperatures, ionic strengths and ionic media in molar concentration scale

| M <sup>n+</sup>  | Ligand                                | logβ <sub>MH<sub>2</sub>L</sub> | logβ <sub>MHL</sub> | logβ <sub>ML</sub> | logβ <sub>ML<sub>2</sub></sub> | logβ <sub>MHL<sub>2</sub></sub> | logβ <sub>MH<sub>2</sub>L<sub>2</sub></sub> | logβ <sub>MOHL<sub>2</sub></sub> | logβ <sub>ML<sub>3</sub></sub> | logβ <sub>MHL<sub>3</sub></sub> | logβ <sub>MH<sub>2</sub>L<sub>3</sub></sub> | logβ <sub>MH<sub>3</sub>L<sub>3</sub></sub> | logβ <sub>M<sub>2</sub>L</sub> | logβ <sub>M<sub>2</sub>L<sub>2</sub></sub> | logβ <sub>M<sub>2</sub>L<sub>3</sub></sub> | Ref. |
|------------------|---------------------------------------|---------------------------------|---------------------|--------------------|--------------------------------|---------------------------------|---------------------------------------------|----------------------------------|--------------------------------|---------------------------------|---------------------------------------------|---------------------------------------------|--------------------------------|--------------------------------------------|--------------------------------------------|------|
| Cu <sup>2+</sup> | <i>DFP</i> <sup>1</sup>               | -                               | -                   | 10.62              | 19.68                          | -                               | -                                           | -                                | -                              | -                               | -                                           | -                                           | -                              | -                                          | -                                          | [33] |
| Cu <sup>2+</sup> | <i>DFP</i> <sup>1</sup>               | -                               | -                   | 10.42              | 19.09                          | 21.98                           | -                                           | 8.49                             | -                              | -                               | -                                           | -                                           | -                              | -                                          | -                                          | [34] |
| Cu <sup>2+</sup> | <i>Asp</i> <sup>2</sup>               | -                               | 12.84               | 9.04               | 15.86                          | -                               | -                                           | -                                | -                              | -                               | -                                           | -                                           | -                              | -                                          | -                                          | [22] |
| Cu <sup>2+</sup> | <i>AcNPrHP</i> <sup>1</sup>           | -                               | -                   | 10.29              | 18.99                          | -                               | -                                           | -                                | -                              | -                               | -                                           | -                                           | -                              | -                                          | -                                          | [35] |
| Fe <sup>3+</sup> | <b>H<sub>2</sub>(L1)</b> <sup>3</sup> | -                               | 19.62               | -                  | 28.79                          | 33.12                           | 36.45                                       | -                                | 37.01                          | -                               | -                                           | -                                           | -                              | -                                          | -                                          | [32] |
| Fe <sup>3+</sup> | <b>H<sub>2</sub>(L4)</b> <sup>3</sup> | -                               | 25.01               | -                  | -                              | -                               | 46.20                                       | -                                | -                              | 48.43                           | 57.52                                       | 65.68                                       | -                              | -                                          | -                                          | [31] |
| Fe <sup>3+</sup> | <i>DFP</i> <sup>1</sup>               | -                               | -                   | 15.10              | 26.61                          | -                               | -                                           | -                                | 35.88                          | -                               | -                                           | -                                           | -                              | -                                          | -                                          | [33] |
| Fe <sup>3+</sup> | <i>DFP</i> <sup>1</sup>               | -                               | -                   | 15.14              | 26.68                          | -                               | -                                           | -                                | 35.92                          | -                               | -                                           | -                                           | -                              | -                                          | -                                          | [36] |
| Fe <sup>3+</sup> | <i>DFP</i> <sup>1</sup>               | -                               | -                   | 15.01              | 27.30                          | -                               | -                                           | -                                | 37.43                          | -                               | -                                           | -                                           | -                              | -                                          | -                                          | [34] |
| Fe <sup>3+</sup> | <i>DFP</i> <sup>1</sup>               | -                               | -                   | 14.80              | 26.70                          | -                               | -                                           | -                                | 36.56                          | -                               | -                                           | -                                           | -                              | -                                          | -                                          | [34] |
| Fe <sup>3+</sup> | <b>H<sub>2</sub>(S1)</b> <sup>4</sup> | -                               | -                   | 14.26              | 25.73                          | 34.91                           | -                                           | -                                | -                              | -                               | -                                           | -                                           | -                              | -                                          | -                                          | [38] |
| Fe <sup>3+</sup> | <b>H<sub>2</sub>(S2)</b> <sup>5</sup> | -                               | -                   | 15.70              | 27.30                          | 36.70                           | -                                           | -                                | -                              | -                               | -                                           | -                                           | -                              | -                                          | -                                          | [39] |
| Fe <sup>3+</sup> | <b>H<sub>2</sub>(S3)</b> <sup>5</sup> | -                               | -                   | 16.60              | 28.00                          | 35.90                           | -                                           | -                                | -                              | -                               | -                                           | -                                           | -                              | -                                          | -                                          | [39] |
| Fe <sup>3+</sup> | <i>Asp</i> <sup>6</sup>               | -                               | -                   | 11.40              | -                              | -                               | -                                           | -                                | -                              | -                               | -                                           | -                                           | -                              | -                                          | -                                          | [22] |
| Fe <sup>3+</sup> | <i>Orn</i> <sup>7</sup>               | -                               | -                   | 8.70               | -                              | -                               | -                                           | -                                | -                              | -                               | -                                           | -                                           | -                              | -                                          | -                                          | [37] |

<sup>1</sup> *I* = 0.10 mol L<sup>-1</sup> in KCl<sub>(aq)</sub>, *T* = 298.15 K; <sup>2</sup> *I* = 0.15 mol L<sup>-1</sup> in NaCl<sub>(aq)</sub>, *T* = 298.15 K; <sup>3</sup> *I* = 0.10 mol L<sup>-1</sup> in KNO<sub>3(aq)</sub>, *T* = 298.15 K; <sup>4</sup> *I* = 0.10 mol L<sup>-1</sup> in KCl<sub>(aq)</sub>, *T* = 310.15 K; <sup>5</sup> *I* = 0.10 mol L<sup>-1</sup> in MOPS (3-(*N*-morpholino)propanesulphonic acid) buffer at pH = 7.4, *T* = 298.15 K; <sup>6</sup> *I* = 0.10 mol L<sup>-1</sup> in Na<sup>+</sup> background electrolyte, *T* = 293.15 K; <sup>7</sup> *I* = 0.10 mol L<sup>-1</sup> in NaClO<sub>4(aq)</sub>, *T* = 293.15 K.

**Ligands abbreviations:** *DFP* = Deferiprone; *Asp* = *L*-Aspartic acid; *Orn* = *L*-Ornithine; *AcNPrHP* = 1-(3'-methylcarboxyaminopropyl)-3-hydroxy-2-methyl-4-pyridinone; **H<sub>2</sub>(L1)** = 4-(3-hydroxy-2-methyl-4-oxopyridin-1(4H)-yl)butanoic acid; **H<sub>2</sub>(L4)** = (S)-2-amino-5-(3-hydroxy-2-methyl-4-oxopyridin-1(4H)-yl)pentanoic acid; **H<sub>2</sub>(S1)** = 3-hydroxy-2-methylpyridin-4(1H)-one; **H<sub>2</sub>(S2)** = 3-hydroxy-1-(2-hydroxyethyl)-2-methylpyridin-4(1H)-one; **H<sub>2</sub>(S3)** = 3-(3-hydroxy-2-methyl-4-oxopyridin-1(4H)-yl)propanoic acid.

**Table S3.**  $pL_{0.5}^1$  values of  $\text{Fe}^{3+}/\text{H}_2(\text{L2})$  and  $\text{Fe}^{3+}/\text{H}(\text{L5})$  systems at different pHs and temperature, from UV-Vis data at  $I = 0.15 \text{ mol L}^{-1}$  in  $\text{NaCl}_{(\text{aq})}$

| Ligand                  | $T/\text{K}$ | pH  | $pL_{0.5}$ | Ligand                  | $T/\text{K}$ | pH  | $pL_{0.5}$ |
|-------------------------|--------------|-----|------------|-------------------------|--------------|-----|------------|
| $\text{H}_2(\text{L2})$ | 298.15       | 2.0 | 4.45       | $\text{H}_2(\text{L2})$ | 310.15       | 5.0 | 11.37      |
| $\text{H}_2(\text{L2})$ | 298.15       | 3.0 | 6.88       | $\text{H}_2(\text{L2})$ | 310.15       | 6.0 | 11.42      |
| $\text{H}_2(\text{L2})$ | 298.15       | 4.0 | 8.12       | $\text{H}_2(\text{L2})$ | 310.15       | 7.4 | 11.35      |
| $\text{H}_2(\text{L2})$ | 298.15       | 5.0 | 8.60       | $\text{H}(\text{L5})$   | 310.15       | 2.0 | 10.41      |
| $\text{H}_2(\text{L2})$ | 298.15       | 6.0 | 8.77       | $\text{H}(\text{L5})$   | 310.15       | 3.0 | 10.83      |
| $\text{H}_2(\text{L2})$ | 298.15       | 7.4 | 9.45       | $\text{H}(\text{L5})$   | 310.15       | 4.0 | 10.92      |
| $\text{H}_2(\text{L2})$ | 298.15       | 8.1 | 9.83       | $\text{H}(\text{L5})$   | 310.15       | 5.0 | 11.37      |
| $\text{H}_2(\text{L2})$ | 310.15       | 2.0 | 8.04       | $\text{H}(\text{L5})$   | 310.15       | 6.0 | 11.52      |
| $\text{H}_2(\text{L2})$ | 310.15       | 3.0 | 10.36      | $\text{H}(\text{L5})$   | 310.15       | 7.4 | 11.51      |
| $\text{H}_2(\text{L2})$ | 310.15       | 4.0 | 11.26      |                         |              |     |            |

<sup>1</sup> values calculated by eq. (3).

**Table S4.** Literature stability constants of  $\text{ZnL}^{(2-z)}$  [19] and  $\text{AlL}^{(3-z)}$  [13] species at  $I = 0.15 \text{ mol L}^{-1}$  in  $\text{NaCl}_{(\text{aq})}$ ,  $T = 298.15 \text{ K}$ .

| Ligand                  | $\log K_{110}^1$     |                      |
|-------------------------|----------------------|----------------------|
|                         | $\text{ZnL}^{(2-z)}$ | $\text{AlL}^{(3-z)}$ |
| $\text{H}_2(\text{L1})$ | 7.27                 | 12.57                |
| $\text{H}_2(\text{L2})$ | 8.20                 | 17.90                |
| $\text{H}_2(\text{L3})$ | 9.52                 | 17.57                |
| $\text{H}_2(\text{L4})$ | 9.68                 | 18.60                |
| $\text{H}(\text{L5})$   | 9.22                 | 15.08                |

<sup>1</sup>  $\log K_{110}$  values refer to equilibrium:  $\text{M}^{n+} + \text{L}^{z-} = \text{ML}^{(n-z)}$ , where  $\text{M}^{n+} = \text{Zn}^{2+}$  and  $\text{Al}^{3+}$

## Figures

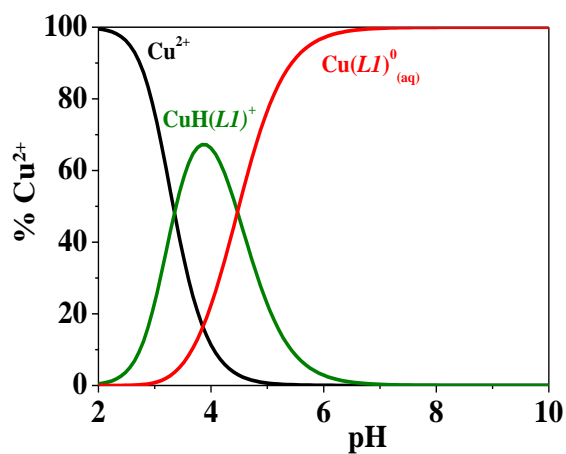

(a)

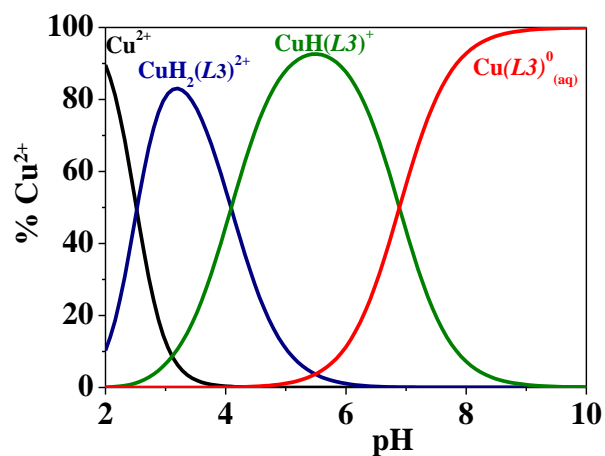

(b)

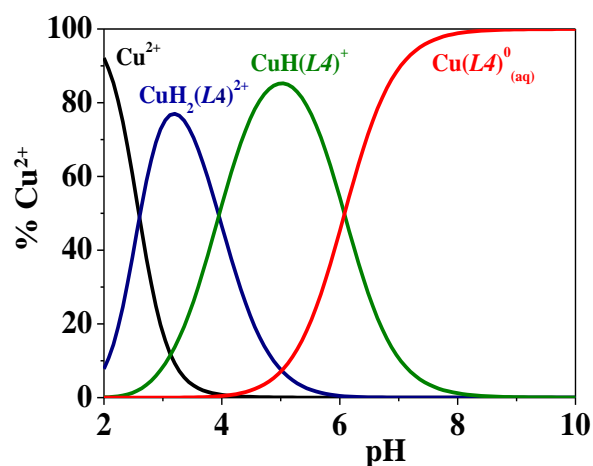

(c)

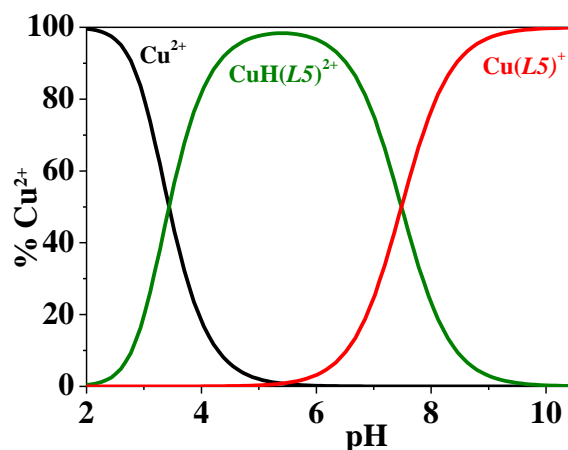

(d)

**Figure S1.** Distribution diagram of  $\text{Cu}^{2+}/(3,4\text{-HPs})$  systems at  $T = 298.15\text{ K}$ ,  $I = 0.15\text{ mol L}^{-1}$  in  $\text{NaCl}_{(\text{aq})}$ ,  $c_{\text{Cu}^{2+}} = 5.0 \cdot 10^{-4}\text{ mol L}^{-1}$  and  $c_{\text{ligand}} = 1.5 \cdot 10^{-3}\text{ mol L}^{-1}$ . Ligands =  $\text{H}_2(\text{L1})$  (a),  $\text{H}_2(\text{L3})$  (b),  $\text{H}_2(\text{L4})$  (c),  $\text{H}(\text{L5})$  (d).

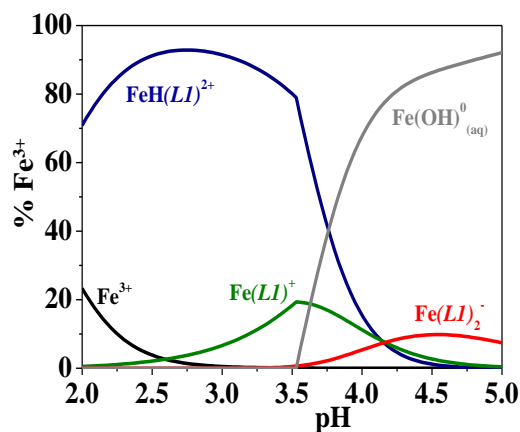

(a)

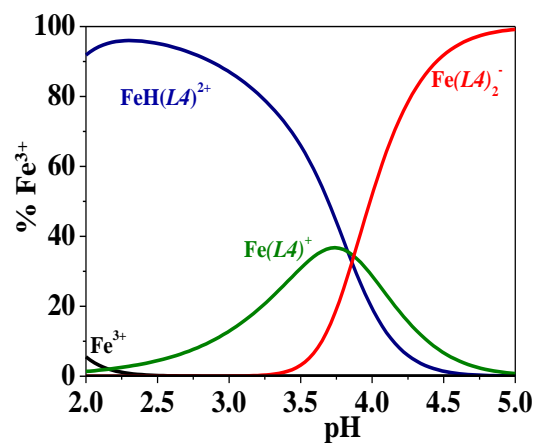

(b)

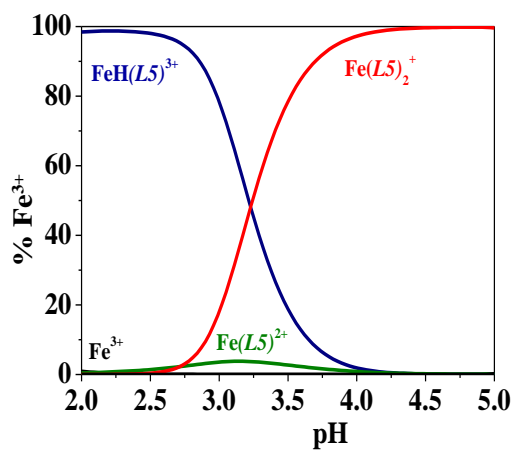

(c)

**Figure S2.** Distribution diagram of Fe<sup>3+</sup>/(3,4-HPs) systems at  $T = 298.15$  K,  $I = 0.15$  mol L<sup>-1</sup> in NaCl<sub>(aq)</sub>,  $c_{\text{Fe}^{3+}} = 5.0 \cdot 10^{-4}$  mol L<sup>-1</sup> and  $c_{\text{ligand}} = 1.1 \cdot 10^{-3}$  mol L<sup>-1</sup>. Ligands = H<sub>2</sub>(L1) (a), H<sub>2</sub>(L4) (b), H(L5) (c).

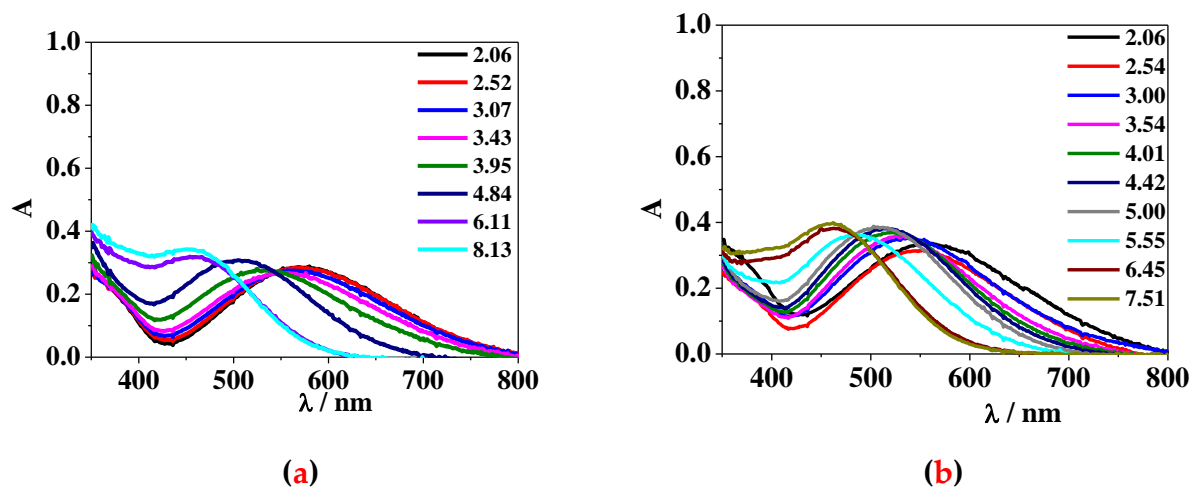

**Figure S3.** UV-Vis absorption profile of  $\text{Fe}^{3+}/\text{H}_2(\text{L}2)$  system at  $I = 0.15 \text{ mol L}^{-1}$  in  $\text{NaCl}_{(\text{aq})}$ ,  $T = 310.15 \text{ K}$  and at different pH values.

**(a)**  $c_{\text{Fe}^{3+}} = 2.3 \cdot 10^{-4} \text{ mol L}^{-1}$ ,  $c_{\text{ligand}} = 2.2 \cdot 10^{-4} \text{ mol L}^{-1}$ ;

**(b)**  $c_{\text{Fe}^{3+}} = 2.0 \cdot 10^{-4} \text{ mol L}^{-1}$ ,  $c_{\text{ligand}} = 4.0 \cdot 10^{-4} \text{ mol L}^{-1}$ .



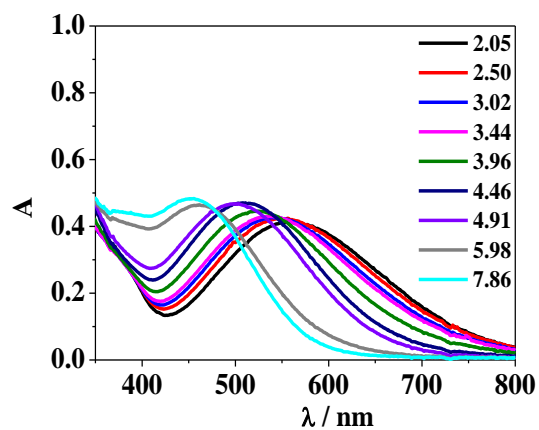

(a)

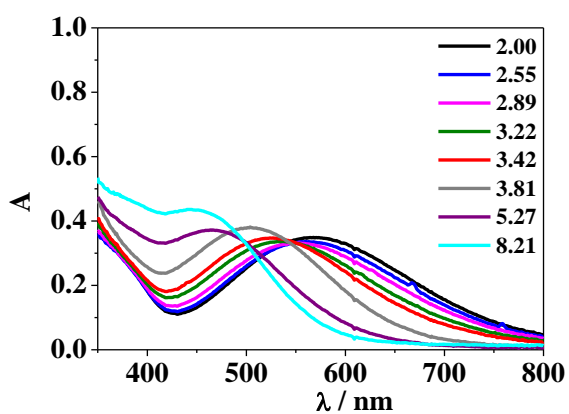

(b)

**Figure S4.** UV-Vis absorption profile of  $\text{Fe}^{3+}/\text{H}(\text{L5})$  system at  $I = 0.15 \text{ mol L}^{-1}$  in  $\text{NaCl}_{(\text{aq})}$ , different temperatures and pH values.

(a)  $T = 298.15 \text{ K}$ ,  $c_{\text{Fe}^{3+}} = 2.4 \cdot 10^{-4} \text{ mol L}^{-1}$ ,  $c_{\text{ligand}} = 2.6 \cdot 10^{-4} \text{ mol L}^{-1}$ ;

(b)  $T = 310.15 \text{ K}$ ,  $c_{\text{Fe}^{3+}} = 2.5 \cdot 10^{-4} \text{ mol L}^{-1}$ ,  $c_{\text{ligand}} = 2.4 \cdot 10^{-4} \text{ mol L}^{-1}$ .

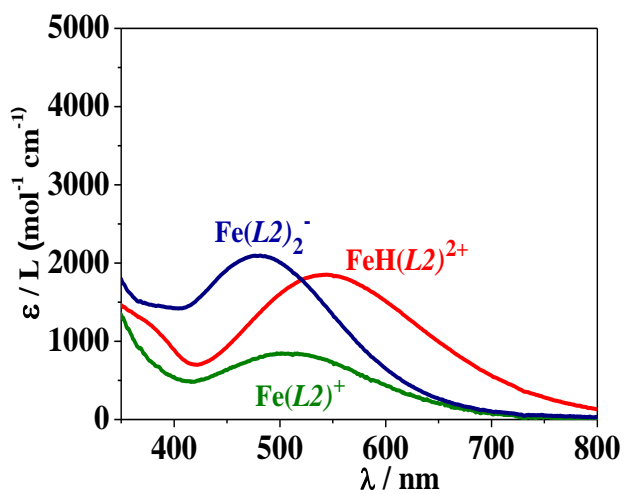

(a)

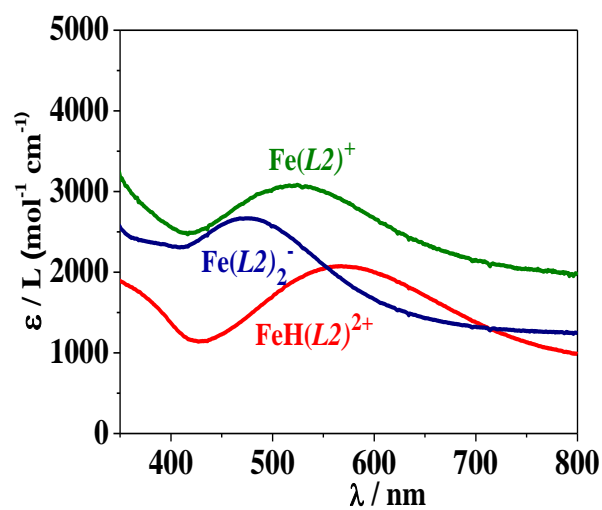

(b)

**Figure S5.** Graphical representation of calculated molar absorptivity of  $\text{Fe}^{3+}/\text{H}_2(\text{L2})$  species at  $T = 298.15 \text{ K}$  (a) and  $310.15 \text{ K}$  (b),  $I = 0.15 \text{ mol L}^{-1}$  in  $\text{NaCl}_{(\text{aq})}$ .

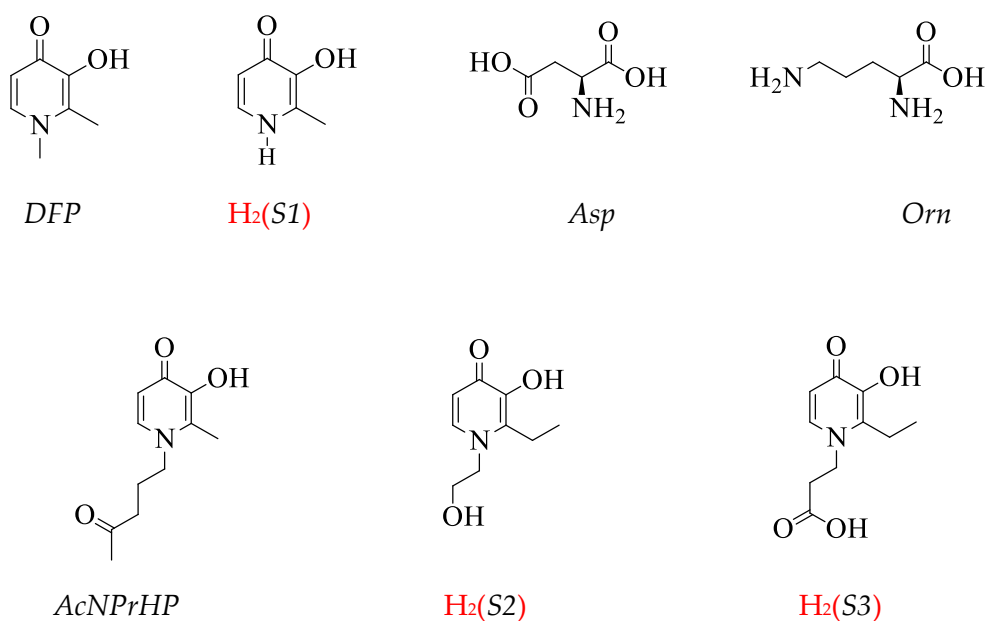

**Figure S6.** Molecular structures of compounds with similar structures and functional groups with respect to 3-hydroxy-4-pyridinones.

**Abbreviations:** *DFP* = Deferiprone; *Asp* = L-Aspartic acid; *Orn* = L-Ornithine; *AcNPrHP* = 1-(3'-methylcarboxyaminopropyl)-3-hydroxy-2-methyl-4-pyridinone; **H<sub>2</sub>(S1)** = 3-hydroxy-2-methylpyridin-4(1H)-one; **H<sub>2</sub>(S2)** = 3-hydroxy-1-(2-hydroxyethyl)-2-methylpyridin-4(1H)-one; **H<sub>2</sub>(S3)** = 3-(3-hydroxy-2-methyl-4-oxopyridin-1(4H)-yl)propanoic acid.

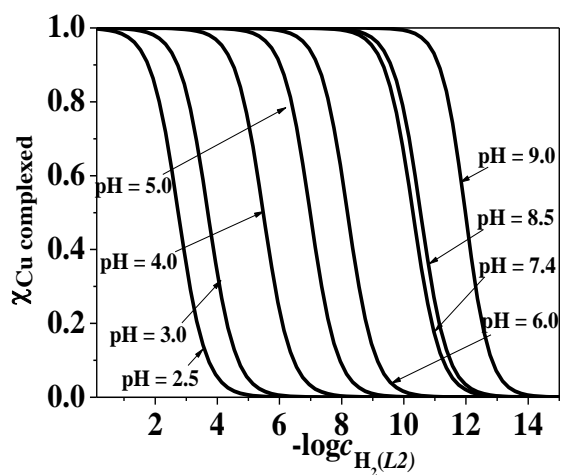

(a)

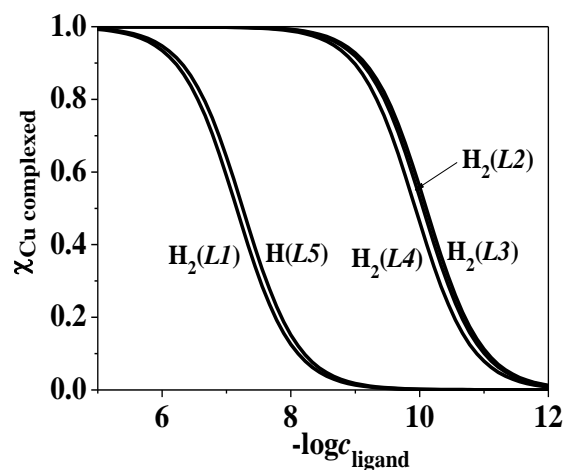

(b)

**Figure S7.** Sequestration diagrams of: **(a)**  $\text{Cu}^{2+}/\text{H}_2(\text{L2})$  species at  $I = 0.15 \text{ mol L}^{-1}$  in  $\text{NaCl}_{(\text{aq})}$  and  $T = 298.15 \text{ K}$  and different pHs,  $pL_{0.5}$  values: 2.74 (pH = 2.5), 3.70 (pH = 3.0), 5.48 (pH = 4.0), 6.99 (pH = 5.0), 8.18 (pH = 6.0), 10.29 (pH = 7.4), 10.54 (pH = 8.1), 11.98 (pH = 9.0); **(b)**  $\text{Cu}^{2+}/(3,4\text{-HPs})$  systems at the same ionic strengths and temperature, pH = 7.4.  $pL_{0.5}$  values: 7.09 ( $\text{H}_2(\text{L1})$ ), 10.29 ( $\text{H}_2(\text{L2})$ ), 10.30 ( $\text{H}_2(\text{L3})$ ), 9.90 ( $\text{H}_2(\text{L4})$ ), 7.25 ( $\text{H}(\text{L5})$ ).

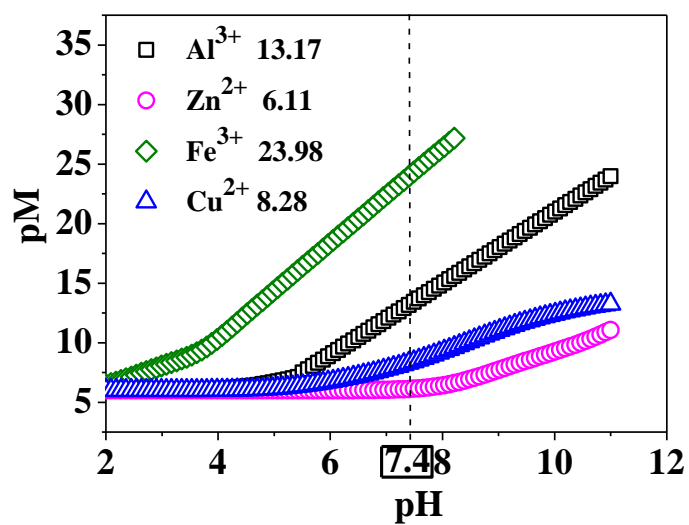

**Figure S8.** Calculated pM values *vs.* pH for the different  $M^{n+}/H(L5)$  systems at  $T = 298.15$  K,  $I = 0.15 \text{ mol L}^{-1}$  in  $\text{NaCl}_{(\text{aq})}$ ,  $c_{M^{n+}} = 1.0 \cdot 10^{-6} \text{ mol L}^{-1}$  and  $c_{\text{ligand}} = 1.0 \cdot 10^{-5} \text{ mol L}^{-1}$ .
